# Supplementary material
Source: PubMed Central journal article supplement (PMC4076932)
Supplement: NIHMS541239-supplement-supplement_1.pdf [file NIHMS541239-supplement-supplement_1.pdf]

**Supplementary Table 1.** Variables in risk model for ICD use by age group

---

Age

Sex

Race

Insurance status

Atrial fibrillation or atrial flutter

Anemia

Cerebrovascular disease

Chronic obstructive pulmonary disease or asthma

Depression

Diabetes mellitus

Dialysis

History of Ischemia

Hyperlipidemia

Hypertension

Peripheral vascular disease

Renal insufficiency

Smoking

Hospital characteristics

    Region

    Teaching status

    Rural/urban

    No. of hospital beds

    Ability to perform heart transplants

    Ability to perform percutaneous intervention for acute myocardial infarction

    Ability to perform coronary artery bypass grafting

Systolic blood pressure on admission

Heart rate on admission
